# Supplementary material
Source: publisher figshare collection journal article supplement (https://gsapubs.figshare.com/ndownloader/files/31786490)
Supplement: Supplementary file 1 [file 31786490]

## Sheet: Table S-1 - basement samples
Table S-1. Data sources for composite basement terranes
Pahau Terrane				Caples Terrane
Sample	Grains (n)	Source		Sample	Grains (n)	Source
t420	62	Cawood et al., 1999		QUOX1	44	Adams et al., 2007
CPD2	40	Pickard et al., 2000		VON2	28	Adams et al., 2007
HUN4	95	Pickard et al., 2000		WRLB1	65	Adams et al., 2007
ETH	60	Wandres et al., 2004		BAL1	70	Adams et al., 2009a
GWA1	84	Adams et al., 2009b		CMPB8	26	Adams et al., 2009a
WAIITI1	31	Adams et al., 2009b		CROM1	39	Adams et al., 2009a
WAIOK1	52	Adams et al., 2009b		HID8	74	Adams et al., 2009a
WWP1	52	Adams et al., 2009b		KAY6	32	Adams et al., 2009a
AKIT1	50	Adams et al., 2013b		MAV2	78	Adams et al., 2009a
AWX1	54	Adams et al., 2013b		NOKZ10	65	Adams et al., 2009a
BID1	67	Adams et al., 2013b		PKTX1	57	Adams et al., 2009a
CPEX2	79	Adams et al., 2013b		POKX1	45	Adams et al., 2009a
ECAP12	48	Adams et al., 2013b		RAIV20	44	Adams et al., 2009a
ECAP6	57	Adams et al., 2013b		RGPX2	54	Adams et al., 2009a
HURW1	51	Adams et al., 2013b		TENN20	25	Adams et al., 2009a
MAND1	42	Adams et al., 2013b		YPX1	22	Adams et al., 2009a
MGPI1	61	Adams et al., 2013b
TAIP1	71	Adams et al., 2013b		Murihiku Terrane
TORA1	76	Adams et al., 2013b		Sample	Grains (n)	Source
TORA2	49	Adams et al., 2013b		HURW4	66	Adams et al., 2007
TP1	60	Adams et al., 2013b		PIOX5	52	Adams et al., 2007
				MATI4	36	Adams et al., 2007
Kaweka Terrane				ROAR2	27	Adams et al., 2007
Sample	Grains (n)	Source		MKP-C	88	Shumaker, 2016
t44	69	Cawood et al., 1999		NBB-A	73	Shumaker, 2016
RUX1	77	Pickard et al., 2000, Adams et al., 2007		AWG-A	94	Shumaker, 2016
DMX1	58	Adams et al., 2009b
GAX38	57	Adams et al., 2009b		Dun Mountain-Maitai Terrane
IKA1	77	Adams et al., 2009b		Sample	Grains (n)	Source
JKS10	73	Adams et al., 2013b		050-NZ	142	Campbell et al., 2019
MANX1	58	Adams et al., 2009b		051-NZ	87	Campbell et al., 2019
MOHX3	82	Adams et al., 2009b		052-NZ	24	Campbell et al., 2019
MUKA1	55	Adams et al., 2009b		053-NZ	27	Campbell et al., 2019
PNAU1	24	Adams et al., 2009b
RTKX2	81	Adams et al., 2009b		Brook Street Terrane
WKPI1	72	Adams et al., 2009b		Sample	Grains (n)	Source
HANM1	68	Adams et al 2011		MAIVX1	77	Adams et al., 2007
MCD1	56	Adams et al 2011
SUM1	82	Adams et al 2011		Buller Terrane
WRV1	48	Adams et al 2011		Sample	Grains (n)	Source
LTHM1	60	Adams et al., 2013b		14MBX1	70	Adams et al., 2015
OHOP1	80	Adams et al., 2013b		AOM1	59	Adams et al., 2015
				AUX24	50	Adams et al., 2015
Rakaia Terrane				JBX1	66	Adams et al., 2015
Sample	Grains (n)	Source		K12300	60	Adams et al., 2015
BMQX35	91	Adams et al., 2007		LYX1	63	Adams et al., 2015
SEL4	55	Adams et al., 2007		OKZ12	10	Adams et al., 2015
NGQ2	95	Pickard et al., 2000		PROV1	66	Adams et al., 2015
RUWX1	35	Adams et al., 2009b		RFTH2	69	Adams et al., 2015
PEM1	48	Adams et al 2011		RFTX1	70	Adams et al., 2015
				SALS2	69	Adams et al., 2015
Waipapa Terrane				WB2	62	Adams et al., 2015
Sample	Grains (n)	Source		WPI1	70	Adams et al., 2015
PKTNX1	17	Pickard et al., 2000, Adams et al., 2007		ZMB1	72	Adams et al., 2015
STEPH1	57	Pickard et al., 2000, Adams et al., 2007		ZR1	69	Adams et al., 2015
TPWX1	60	Pickard et al., 2000, Adams et al., 2007		ZYXX1	67	Adams et al., 2015
TWHX1	71	Pickard et al., 2000, Adams et al., 2007
TWX1	55	Pickard et al., 2000, Adams et al., 2007		Takaka Terrane
HAX20	70	Adams et al., 2009a;Adams et al., 2013		Sample	Grains (n)	Source
KPT56	61	Adams et al., 2009b		BRXX14	72	Adams et al., 2015
KWI1	23	Adams et al., 2009b		COBX1	68	Adams et al., 2015
MOEQ3	75	Adams et al., 2009b		ELL1	55	Adams et al., 2015
OTOK2	68	Adams et al., 2009b		JCT1	86	Adams et al., 2015
TWXX1	68	Adams et al., 2009b		JCT21	57	Adams et al., 2015
ADMZ1	38	Adams et al., 2013		TAK1	70	Adams et al., 2015
HAX10	71	Adams et al., 2013		TAK2	82	Adams et al., 2015
KWK1	51	Adams et al., 2013		TAKX10	54	Adams et al., 2015
RWH1	38	Adams et al., 2013		TAKX9	63	Adams et al., 2015
STB1	60	Adams et al., 2013		WGPKX3	87	Adams et al., 2015
				WGPY2	76	Adams et al., 2015
				WGPY3	69	Adams et al., 2015
